# Supplementary material
Source: PubMed Central journal article supplement (PMC10627429)
Supplement: NIHMS1940340-supplement-1.pdf [file NIHMS1940340-supplement-1.pdf]

## **ASSOCIATED CONTENT**

The Supporting Information is available free of charge on the ACS Publications website
